# Supplementary material
Source: ML conference proceedings conference paper supplement (https://openaccess.thecvf.com/content/CVPR2023/html/Liu_Hierarchical_Supervision_and_CVPR_2023_paper.html)
Supplement: Supplementary file 1 [file Liu_Hierarchical_Supervision_and_CVPR_2023_supplemental.pdf]

# Supplementary Material for Hierarchical Supervision and Shuffle Data Augmentation for 3D Semi-Supervised Object Detection

Chuangdong Liu<sup>1,2</sup>, Chenqiang Gao<sup>1,2</sup>, Fangcen Liu<sup>1,2</sup>, Pengcheng Li<sup>1,2</sup>, Deyu Meng<sup>3,4</sup>, Xinbo Gao<sup>1</sup>

<sup>1</sup>School of Communication and Information Engineering, Chongqing University of Posts and Telecommunications, Chongqing, China

<sup>2</sup>Chongqing Key Laboratory of Signal and Information Processing, Chongqing, China

<sup>3</sup>Xi'an Jiaotong University, Xi'an, China

<sup>4</sup>Macau University of Science and Technology, Taipa, Macau

## 1. Discuss on Other Augmentation Methods for Point Cloud

The Mixup-based [8] augmentation methods have been extensively studied in the field of image classification and widely applied in 2D semi-supervised object detection [6] task. Following this idea, there have been several explorations in point cloud tasks as well. PointMixup [1] first applied the idea of Mixup to point cloud and achieved linear interpolation through the optimal allocation. Mix3D [3] balances global contextual information and local geometric information to achieve high-performance models. In addition, PointCutMix [9] proposes two different ways of replacing points to mix two point clouds. The latest SageMix explores salient regions in two point clouds and smoothly combines them into a continuous shape. However, these methods mainly focus on point cloud classification and segmentation tasks. For outdoor 3D object detection task, objects are usually naturally separated [5], and merging two point cloud scenes will cause overlaps between objects (*e.g.*, two vehicles are rarely overlapped in 3D reality). Therefore, to the best of our knowledge, the above Mixup-based point cloud augmentation methods cannot be directly applied to detection tasks, which is the direction for our future research.

## 2. Visualization of Dynamic Dual-Threshold

To better understand the dual-threshold hierarchical supervision in intuitive, we visualize the dynamic threshold changes during the training process in Fig. 1, where a solid line of a certain color represents a high threshold, and the dotted line of the same color represents a low threshold.

## 3. Additional Experimental Results

**(1) Additional experiments on the Waymo Dataset.** We additionally test the Voxel-RCNN [2] on 1% of the Waymo [7] dataset, and the results in Tab. 1 still show the superiority of our method, which validates its generalization.

**(2) If the shuffle data augmentation (SDA) strategy is also effective for full supervision training ?** To verify the effect of the SDA on fully-supervised 3D object detector, we inset the SDA into the PV-RCNN [4] and the results are listed in Tab. 2, which shows that the superiority of SDA in the supervised framework is not as obvious as in the semi-supervised framework. This is due to that the design of the strong augmentation in the student branch module has two main purposes: (1) strong enough to make a significant difference with weakly augmented samples of the teacher branch and (2) not too strong to ensure effective supervision information transmission.

## References

- [1] Yunlu Chen, Vincent Tao Hu, Efstratios Gavves, Thomas Mensink, Pascal Mettes, Pengwan Yang, and Cees GM Snoek. Pointmixup: Augmentation for point clouds. In *ECCV*, pages 330–345. Springer, 2020. 1
- [2] Jiajun Deng, Shaoshuai Shi, Peiwei Li, Wengang Zhou, Yanyong Zhang, and Houqiang Li. Voxel r-cnn: Towards high performance voxel-based 3d object detection. In *AAAI*, pages 1201–1209, 2021. 1, 2
- [3] Alexey Nekrasov, Jonas Schult, Or Litany, Bastian Leibe, and Francis Engelmann. Mix3d: Out-of-context data augmentation for 3d scenes. In *3DV*, pages 116–125. IEEE, 2021. 1
- [4] Shaoshuai Shi, Chaoxu Guo, Li Jiang, Zhe Wang, Jianping Shi, Xiaogang Wang, and Hongsheng Li. Pv-rnn: Point-voxel feature set abstraction for 3d object detection. In *CVPR*, pages 10529–10538, 2020. 1, 2

| 1% Data<br>( $\sim 1.4k$ scenes) | Veh.<br>(LEVEL 1)  | Veh.<br>(LEVEL 2)  | Ped.<br>(LEVEL 1)  | Ped.<br>(LEVEL 2)  | Cyc.<br>(LEVEL 1)  | Cyc.<br>(LEVEL 2)  |
|----------------------------------|--------------------|--------------------|--------------------|--------------------|--------------------|--------------------|
| Voxel-RCNN [2]                   | 49.02/48.03        | 42.36/41.50        | 41.16/32.81        | 34.73/27.66        | 5.84/5.61          | 5.62/5.40          |
| Ours (Voxel-RCNN-based)          | <b>54.89/54.06</b> | <b>48.28/47.53</b> | <b>43.86/37.84</b> | <b>36.59/31.56</b> | <b>17.47/16.73</b> | <b>16.72/16.01</b> |

Table 1. Results on the Waymo for the Voxel-RCNN detector

| Model                | Data | 3D Detection (Car) |              |              | 3D Detection (Ped.) |              |              | 3D Detection (Cyc.) |              |              |
|----------------------|------|--------------------|--------------|--------------|---------------------|--------------|--------------|---------------------|--------------|--------------|
|                      |      | Easy               | Mod          | Hard         | Easy                | Mod          | Hard         | Easy                | Mod          | Hard         |
| PV-RCNN [4]          | 100% | <b>92.10</b>       | 84.36        | <b>82.48</b> | <b>63.12</b>        | 54.84        | <b>51.78</b> | 89.10               | 70.38        | 66.01        |
| PV-RCNN [4] with SDA | 100% | 91.91              | <b>84.57</b> | 82.31        | 62.83               | <b>55.49</b> | 51.04        | <b>89.68</b>        | <b>71.09</b> | <b>66.71</b> |

Table 2. Ablation study of SDA in the fully supervised framework.

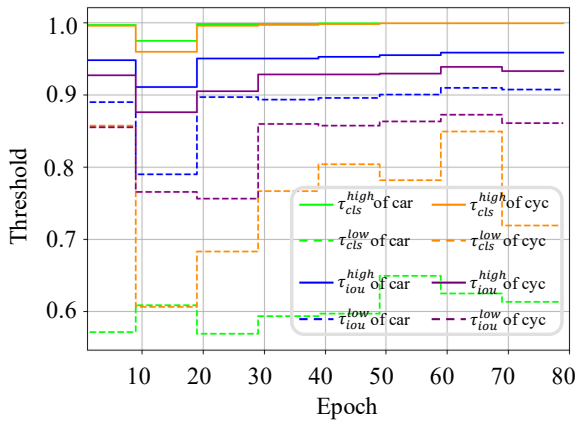

Figure 1. Visualization curve of the dynamic dual-threshold during training

- [5] Shaoshuai Shi, Xiaogang Wang, and Hongsheng Li. Point-rcnn: 3d object proposal generation and detection from point cloud. In *CVPR*, pages 770–779, 2019. 1
- [6] Kihyuk Sohn, Zizhao Zhang, Chun-Liang Li, Han Zhang, Chen-Yu Lee, and Tomas Pfister. A simple semi-supervised learning framework for object detection. *arXiv preprint arXiv:2005.04757*, 2020. 1
- [7] Pei Sun, Henrik Kretschmar, Xerxes Dotiwalla, Aurelien Chouard, Vijaysai Patnaik, Paul Tsui, James Guo, Yin Zhou, Yuning Chai, Benjamin Caine, et al. Scalability in perception for autonomous driving: Waymo open dataset. In *CVPR*, pages 2446–2454, 2020. 1
- [8] Hongyi Zhang, Moustapha Cisse, Yann N Dauphin, and David Lopez-Paz. mixup: Beyond empirical risk minimization. *arXiv preprint arXiv:1710.09412*, 2017. 1
- [9] Jinlai Zhang, Lyujie Chen, Bo Ouyang, Binbin Liu, Jihong Zhu, Yujin Chen, Yanmei Meng, and Danfeng Wu. Point-cutmix: Regularization strategy for point cloud classification. *Neurocomputing*, 505:58–67, 2022. 1
